# Supplementary material
Source: publisher figshare collection journal article supplement (https://gsajournals.figshare.com/ndownloader/files/12249365)
Supplement: Supplementary file 1 [file 12249365]

## Sheet: TableS6
Approximate size of pericentromeric heterochromatin in all 12 chromosomes deduced from Sharma et al. (2013).
Chromosome	Heterochromatin (Mb)
chr01	53.2921
chr02	16.4598
chr03	31.3457
chr04	38.3033
chr05	32.4922
chr06	30.6998
chr07	31.4055
chr08	28.1111
chr09	34.3853
chr10	41.2373
chr11	22.0088
chr12	38.6534
Total	398.394
